# The Neuro Bureau ADHD-200 Preprocessed Repository

Pierre Bellec<sup>a,b,c,\*</sup>, Carlton Chu<sup>a,d</sup>, François Chouinard-Decorte<sup>a,b,e</sup>, Daniel S. Margulies<sup>a,f</sup>,  
R. Cameron Craddock<sup>a,g,h,\*</sup>

<sup>a</sup>*The Neuro Bureau*

<sup>b</sup>*Centre de Recherche de l'Institut Universitaire de Gériatrie de Montréal, Montréal, CA*

<sup>c</sup>*Département d'Informatique et de Recherche Opérationnelle, Université de Montréal, Montréal, CA*

<sup>d</sup>*Google DeepMind, London, UK*

<sup>e</sup>*Integrated Program in Neuroscience, McGill University, Montreal, CA*

<sup>f</sup>*Max Planck Research Group for Neuroanatomy & Connectivity, Max Planck Institute for Human  
Cognitive and Brain Sciences, Leipzig, Germany*

<sup>g</sup>*Computational Neuroimaging Laboratory, Center for Biomedical Imaging and Neuromodulation, Nathan  
S. Kline Institute for Psychiatric Research, Orangeburg, NY, USA*

<sup>h</sup>*Center for the Developing Brain, Child Mind Institute, New York, NY, USA*

---

## Abstract

In 2011, the “ADHD-200 Global Competition” was held with the aim of identifying biomarkers of attention-deficit/hyperactivity disorder from resting-state functional magnetic resonance imaging (rs-fMRI) and structural MRI (s-MRI) data collected on 973 individuals. Statisticians and computer scientists were potentially the most qualified for the machine learning aspect of the competition, but generally lacked the specialized skills to implement the necessary steps of data preparation for rs-fMRI. Realizing this barrier to entry, the Neuro Bureau prospectively collaborated with all competitors by preprocessing the data and sharing these results at the Neuroimaging Informatics Tools and Resources Clearinghouse (NITRC) ([http://www.nitrc.org/frs/?group\\_id=383](http://www.nitrc.org/frs/?group_id=383)). This “ADHD-200 Preprocessed” release included multiple analytical pipelines to cater to different philosophies of data analysis. The processed derivatives included denoised and registered 4D fMRI volumes, regional time series extracted from brain parcellations, maps of 10 intrinsic connectivity networks, fractional amplitude of low frequency fluctuation, and regional homogeneity, along with grey matter density maps. The data was used by several teams who competed in the ADHD-200 Global Competition, including the winning entry by a group of biostatisticians. To the best of our knowledge, the ADHD-200 Preprocessed release was the first large public resource of preprocessed resting-state fMRI and structural MRI data, and remains to this day the only resource featuring a battery of alternative processing paths.

**Keywords:** preprocessed fMRI, data sharing, neuroimaging competition

---



---

\*Corresponding authors.

*Email addresses:* pierre.bellec@criugm.qc.ca (Pierre Bellec), carltonchu1@gmail.com (Carlton Chu), francois.chouinard@gmail.com (François Chouinard-Decorte), margulies@cbs.mpg.de (Daniel S. Margulies), ccraddock@nki.rfmh.org (R. Cameron Craddock)

*URL:* bellec.simexp-lab.org (Pierre Bellec), computational-neuroimaging-lab.org (R. Cameron Craddock)

*Preprint submitted to Neuroimage*

*January 17, 2016*

## 1. Introduction

In 2011, the “ADHD-200 Global Competition” was held with the aim of engaging researchers from a variety of analytical backgrounds to identify biomarkers of attention-deficit/hyperactivity disorder (ADHD) from resting-state functional magnetic resonance imaging (rs-fMRI) and structural MRI (s-MRI) data [1]. The competition made use of the “ADHD-200 Sample” data collection that was aggregated from eight independent sites and shared through the International Neuroimaging Datasharing Initiative (INDI) [2]. The data includes rs-fMRI, structural MRI (s-MRI), and basic phenotypic information for 973 individuals (585 typically-developing controls (TDC), 362 ADHD, 26 unknown) [1]. Competitors were given five and a half months to optimize a classification algorithm on training data (776 individuals) and submit their predicted clinical labels on test data for which diagnostic information was withheld. The competition data was distributed in a raw form and, before any analysis could begin, the images had to be preprocessed to make them comparable across individuals and reduce noise. These preprocessing steps present a significant hurdle for would-be competitors who do not have the specialist knowledge of neuroimaging methods or access to high performance computing resources. Realizing this barrier to entry, the Neuro Bureau prospectively collaborated with all competitors by preprocessing the data and sharing these results.

The “ADHD-200 Preprocessed” is a repository of preprocessed rs-fMRI and s-MRI data along with statistical derivatives from the ADHD-200 Sample. Rather than favoring a specific processing strategy, we followed a pluralistic approach by preprocessing the data using multiple pipelines (called “Athena”, “Burner” and “NIAK”) that differed in the toolsets used, the philosophy motivating choices of algorithms and parameters, and the statistical derivatives calculated. The Athena pipeline processed rs-fMRI and s-MRI images using a combination of AFNI [3] and FSL [4] neuroimaging toolkits. The Burner pipeline used SPM8 [5] to process s-MRI data for voxel-based morphometry. The NIAK pipeline processed rs-fMRI and s-MRI using the NeuroImaging Analysis Kit [6].

## 2. Organization and access to the repository

The ADHD-200 Preprocessed data was released in 2011 and can be downloaded from NITRC<sup>1</sup>. No data usage agreement is required to access or download the data, the only requirement is registering for a free NITRC account. This registration enables downloads to be tracked for usage statistics users to be contacted in the event that errors are found in the dataset. The ADHD-200 Sample allows unrestricted data usage for non-commercial research purposes provided that the specific datasets included in an analysis be cited appropriately and that their funding sources be acknowledged<sup>2</sup>. There are no more restrictions placed on the preprocessed data or derivatives other than the request that the ADHD-200 Preprocessed

---

Craddock)

<sup>1</sup>[http://www.nitrc.org/frs/?group\\_id=383](http://www.nitrc.org/frs/?group_id=383)

<sup>2</sup>[http://fcon\\_1000.projects.nitrc.org/indi/ADHD-200/](http://fcon_1000.projects.nitrc.org/indi/ADHD-200/)

Initiative is cited appropriately and that the specific pipeline is acknowledged in publications using the data. A forum is available on the Neuro Bureau’s NITRC project page for users to ask questions or report problems<sup>3</sup>. Questions regarding data acquisition or phenotypic variables should be directed to INDI’s support forum<sup>4</sup>.

### 3. Contents of the repository

The ADHD-200 Preprocessed repository contains preprocessed outputs and derivatives for data from the ADHD-200 Sample, which includes 973 individuals (352 F) between the ages of 7 and 27 aggregated from 17 different studies conducted across 8 different sites (for a breakdown of age and sex by diagnosis see Table 1). For each individual, phenotypic data includes sex, age, handedness, ADHD diagnosis (585 TDC, 362 ADHD, 26 unknown), ADHD subtype (ADHD-combined, ADHD-inattentive, ADHD-hyperactive/impulsive), one of three different measures of ADHD severity, one of five measures of intelligence, co-morbid diagnoses, and whether or not they have used medication to treat their symptoms [1]. Imaging data for each individual includes one or more T1-weighted high-resolution s-MRI scan (s-MRI) and one or more rs-fMRI scan. The majority of data was acquired during a single imaging session, although a second session is available for 15 individuals from the Washington University at Saint Louis (WUSTL) site. There is a substantial amount of variation in data acquisition procedures across sites including the type of MRI system and scanning parameters, the length of the rs-fMRI scans, and the instructions given to participants prior to the scan (see Tables 2 and 3).

Nearly all of the imaging data from the ADHD-200 Sample was included in the pre-processing effort, though some individuals were excluded for poor quality or missing data<sup>5</sup>. The results of the preprocessing are made available as a collection of compressed tar files that are organized by pipeline, sites of data collection, training and test samples, as well as by derivatives. A group-level file containing the phenotypic data is available in comma-separated-values format (.csv).

Shared preprocessed data and extracted features include:

- 3D grey matter density maps suitable for voxel-based morphometry – Athena and Burner (see Figure 1,
- 4D preprocessed resting-state fMRI data including limited intermediaries and quality assessment – Athena and NIAK,
- Average time series for brain regions from structurally defined parcellations – Athena (see Figures 2 and 3),

<sup>3</sup>[http://www.nitrc.org/forum/forum.php?forum\\_id=2046](http://www.nitrc.org/forum/forum.php?forum_id=2046)

<sup>4</sup>[http://www.nitrc.org/forum/forum.php?forum\\_id=1735](http://www.nitrc.org/forum/forum.php?forum_id=1735)

<sup>5</sup>Further information regarding excluded data can be found at the respective pipeline wiki page: Athena: [http://www.nitrc.org/plugins/mwiki/index.php/neurobureau:AthenaPipeline#Excluded\\_Data](http://www.nitrc.org/plugins/mwiki/index.php/neurobureau:AthenaPipeline#Excluded_Data); Burner: <http://www.nitrc.org/plugins/mwiki/index.php/neurobureau:BurnerPipeline>; NIAK: <http://www.nitrc.org/plugins/mwiki/index.php/neurobureau:NIAKPipeline>.

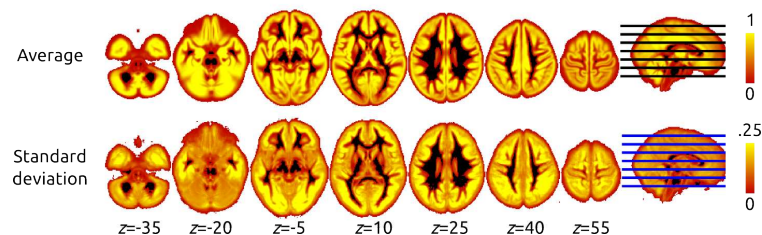

Figure 1: Grey matter density maps generated by the Burner pipeline. An example of an individual map is presented, along with the average and standard deviation maps for all subjects in the test subsample of ADHD-200 Preprocessed.

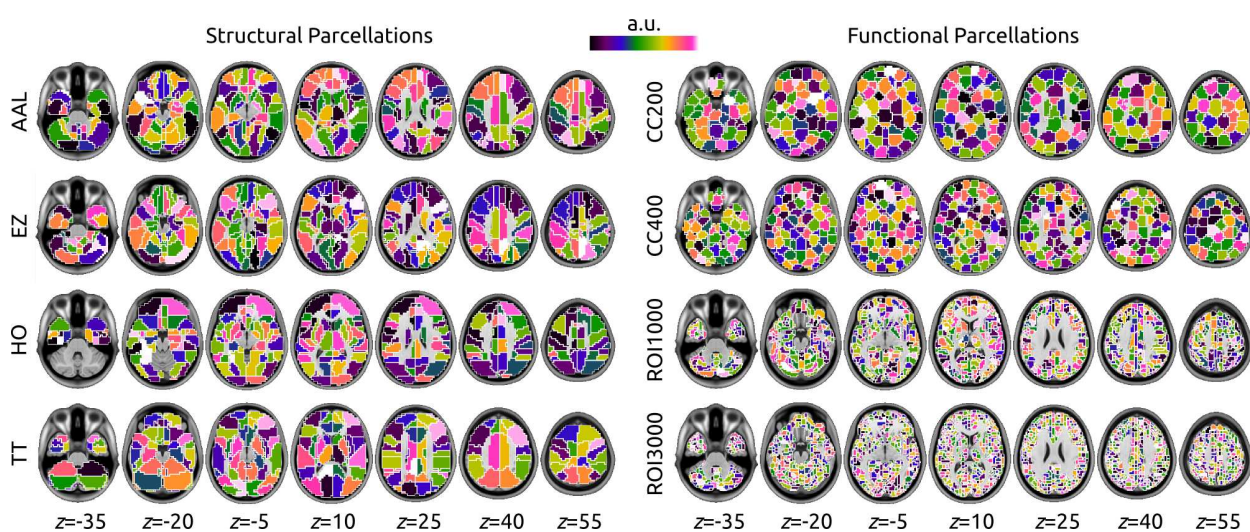

Figure 2: The brain parcellations used to generate regional time series in the NIAK (ROI1000 and ROI3000) and Athena (all other parcellations) pipelines. Each region was randomly assigned to one color in the colormap, and the in-plane outline of regions was painted white at 1 mm resolution.

- Average time series for brain regions for regions defined by functional parcellation – Athena and NIAK (see Figures 2 and 3),
- Spatial maps for 10 intrinsic connectivity networks (ICNs), fractional amplitude of low frequency fluctuations (fALFF), and regional homogeneity (ReHo) – Athena (see Figure 4).

### 3.1. Athena Pipeline

The Athena pipeline<sup>6</sup> processed rs-fMRI and s-MRI images using a custom BASH script that combined AFNI [3] and FSL [4] neuroimaging toolkits and was run on the Athena computer cluster at Virginia Tech's Advanced Research Computing center<sup>7</sup>. The processing

<sup>6</sup><http://www.nitrc.org/plugins/mwiki/index.php/neurobureau:AthenaPipeline>

<sup>7</sup><http://www.arc.vt.edu/>



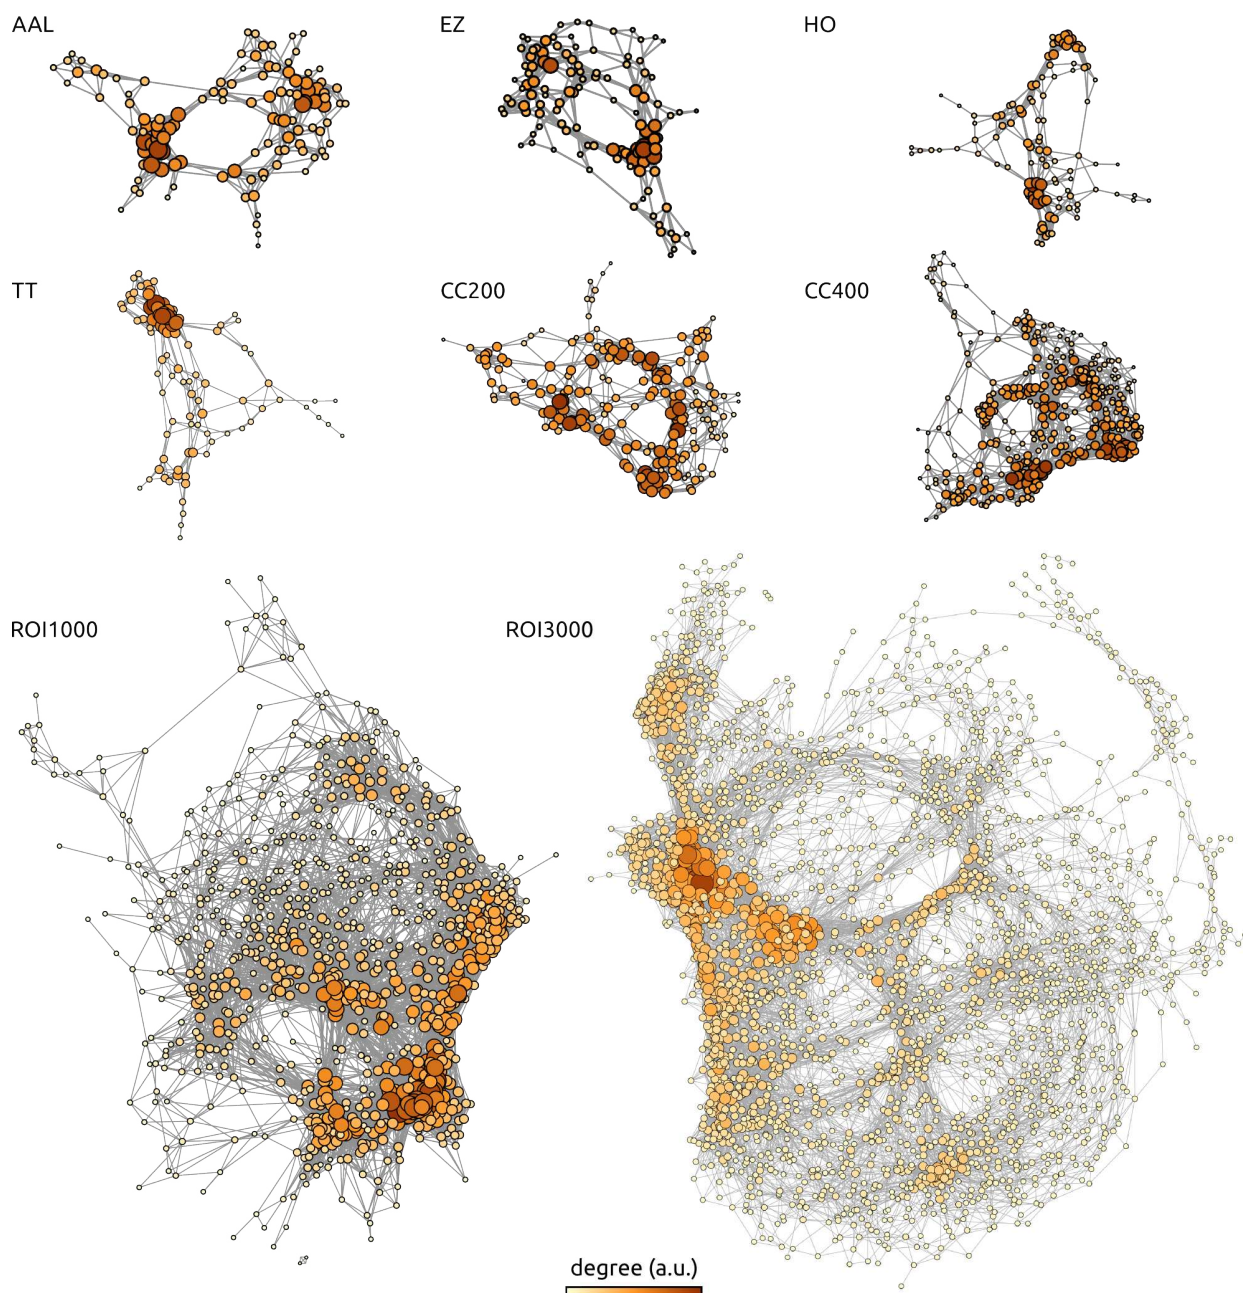

Figure 3: The average functional connectivity matrix (Pearson's correlation coefficient between regional time series) was generated across all individuals of the KKI site, for all parcellations of the release (see text for details). This matrix was further binarized by retaining connections with an average correlation larger than 0.3. The resulting binary adjacency matrices have been represented with an automated layout generated by Yfan Hu's multilevel algorithm, as implemented in the Gephi software [7]. The size and color of each node was set proportional to its degree, relative to the min and max inside the graph.

scripts for each site are distributed in the repository, along with output log files for each

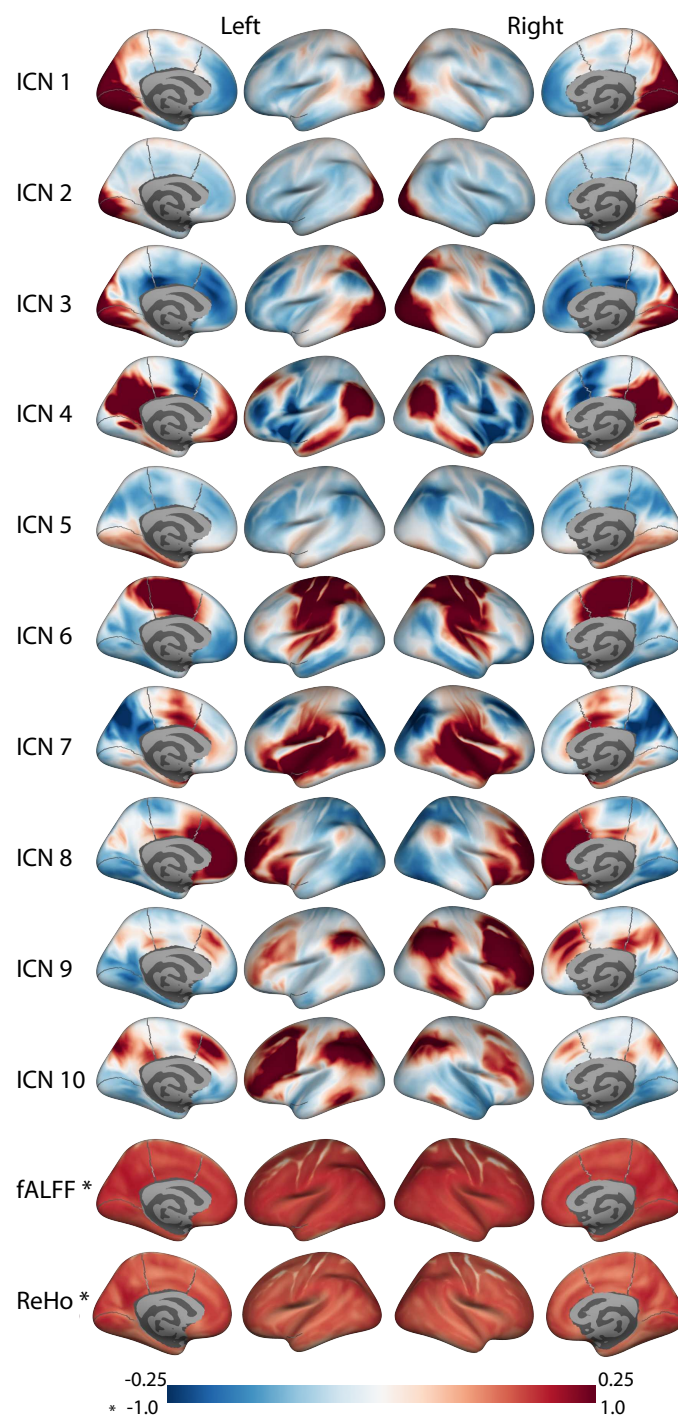

Figure 4: Derivatives from the Athena pipeline including ten intrinsic connectivity networks (ICNs), fractional amplitude of low-frequency fluctuations (fALFF), and regional homogeneity (ReHo). Asterisks (\*) in the latter two derivatives denote the difference in colorbar max/min values, as indicated.

processed dataset.

### 3.1.1. Structural processing

Athena’s s-MRI pipeline began with skull-stripping to remove non-brain tissue and background from the images [8] and segmenting the results into white matter (WM), cerebrospinal fluid (CSF), and grey matter (GM) probability maps [9]. A non-linear warp was calculated between the skull-off image and MNI space as represented by the NIHPD 4.5–18.5y age-specific asymmetric template [10] using a two step procedure that calculates a linear transform [11] that is subsequently refined by a non-linear registration procedure [12]. *Shared s-MRI outputs include:* skull-stripped whole-brain images and smoothed (by a 6 mm FWHM Gaussian) and unsmoothed GM density maps in MNI space at  $1 \times 1 \times 1$  mm<sup>3</sup> resolution, along with the FSL fNIRT non-linear warp, as compressed NIfTI files (.nii.gz).

### 3.1.2. Functional processing

*Preprocessing.* Athena’s rs-fMRI pipeline involved removing the first four volumes to allow for magnetization to reach equilibrium, site-specific slice timing correction to the middle slice, re-aligning each volume to the first volume to correct for motion [13], and calculating a linear transform between the mean functional volume and the corresponding s-MRI [11]. The rs-fMRI to s-MRI transform was then combined with the s-MRI to MNI non-linear warp to write the functional data into MNI152 space at  $4 \times 4 \times 4$  mm<sup>3</sup> resolution. Mean WM and CSF signals extracted using the masks calculated during s-MRI processing were included along with 6 head motion parameters and a third-order polynomial in voxelwise nuisance regression models to remove variation due to physiological noise, head motion and scanner drifts from the time series [14, 15]. The resulting denoised time series were band-pass filtered ( $0.009 \text{ Hz} < f < 0.08 \text{ Hz}$ ) to limit the data to the frequencies implicated in resting state functional connectivity [16, 17] and then spatially smoothed with a 6 mm FWHM Gaussian filter. *Shared rs-fMRI outputs include:* denoised rs-fMRI volumes, with and without temporal bandpass filtering, in MNI space (compressed 4D NIfTIs, nii.gz), the mean rs-fMRI image and brain mask in template space (.nii.gz), and six parameter head motion traces (tab-separated values, AFNI .1D files).

*Time series for structurally defined brain areas.* Regional time series were extracted for the automated anatomical labeling (AAL) [18], Eickhoff-Zilles (EZ) [19], Harvard-Oxford (HO) [20–23], and Talairach and Tournoux (TT) [24] parcellations. The EZ parcellation was derived from the max-propagation parcellation distributed with the SPM Anatomy Toolbox<sup>8</sup> and was transformed into template space using the Colin 27 template (also distributed with the toolbox) as an intermediary. The HO parcellation was constructed from 25% thresholded cortical and subcortical max-propagation parcellations distributed with FSL. The parcellations were bisected into left and right hemispheres at the midline ( $x = 0$ ), ROIs representing left/right WM, left/right GM, left/right CSF and brainstem were removed

<sup>8</sup>[http://www.fz-juelich.de/inm/inm-1/EN/Forschung/\\_docs/SPMAnatomyToolbox/SPMAnatomyToolbox\\_node.html](http://www.fz-juelich.de/inm/inm-1/EN/Forschung/_docs/SPMAnatomyToolbox/SPMAnatomyToolbox_node.html)

from the subcortical parcellation and then the subcortical and cortical ROIs were combined into a single parcellation. The AAL parcellation distributed with the SPM8 version of the AAL Toolbox<sup>9</sup> and the TT parcellation distributed with AFNI were coregistered and warped into template space. Each of the structural parcellations were resampled into the functional space using nearest-neighbor interpolation. The average time series within each parcel were extracted from both the filtered and unfiltered data and are distributed in tab-separated values format (AFNI .1D). Each of the conformed ROI parcellations are available as compressed 3D NIfTI files (.nii.gz).

*Time series for functionally defined parcellations.* The CC200 and CC400 functional brain parcellations were constructed using a two-stage spatially-constrained spectral clustering procedure [25] applied to unfiltered preprocessed rs-fMRI data from a subset ( $N = 650$ ) of the participants in the training dataset. Participants were chosen for inclusion based on registration quality and after excluding participants with more than 3 mm translation or 3 degrees rotations in their motion parameters. To reduce computation time, the clustering was restricted to grey matter using a group GM mask that was constructed by averaging individual GM masks derived from FreeSurfer automated segmentation [26]. Although 200 and 400 ROIs were specified in the functional parcellation procedure, the normalized cut algorithm resulted in 190 and 351 clusters respectfully. Time series were extracted for each parcellation from both the filtered and unfiltered data by averaging the voxel time series contained within each labeled region and are distributed in tab-separated values format (AFNI .1D). CC200 and CC400 brain parcellations are available as compressed 3D NIfTI files (.nii.gz).

*ICN time series and spatial maps.* Time series and spatial maps were derived for 10 ICNs that have been found to be consistent across resting-state datasets and a variety of neuroimaging tasks [27] by applying a modified dual-regression approach [28] to the unfiltered preprocessed data. A spatial multiple regression was first used to extract time series corresponding to each network. In a second step, each time course was independently correlated with whole-brain time series to generate subject-specific functional connectivity maps for each network. Alternatively, all time series were entered simultaneously into a multiple (temporal) regression, and the regression coefficients associated with each time series constituted the functional connectivity maps. The resulting ICN time series are distributed as tab-separated values (AFNI .1D) files and the spatial maps for both temporal regression approaches are distributed as compressed 4D NIfTI files (.nii.gz).

*fALFF and ReHo.* Whole brain fALFF maps were generated by dividing the variance of each voxel's bandpass-filtered time series by the variance of its unfiltered time series [29]. ReHo was estimated from the unfiltered data at each voxel by the Kendall's Coefficient of Concordance [30] between the voxel and its 26 face-, edge-, and corner- touching neighbors. The resulting fALFF and ReHo whole brain maps are distributed as compressed 3D NIfTI files (.nii.gz).

---

<sup>9</sup><http://www.cyceron.fr/index.php/en/plateforme-en/freeware>



### 3.1.3. Quality Control

With the exception of a few datasets that were missing data, and one dataset that was corrupted, all of the ADHD-200 Sample was processed and released by Athena, regardless of data quality. This was done to accomodate differing opinions as to what qualifies as usable data, and to provide poor quality data that may be used by others to develop methods that are robust to noise. Files containing the six motion parameters for each rs-fMRI data and anatomical and mean EPI images in template space have been included in the release to enable users to determine high-motion data or poor registrations. Additional quality metrics derived from the s-MRI, GM masks, mean rs-fMRI images, fALFF maps and FC maps were also included to help with the QC process.

For each data type a mean and standard deviation image was calculated from all of the scans from all of the subjects. These images were used to perform a voxelwise z-score transformation on each data type for each subject  $z_i = \frac{(v_i - m_i)}{\sigma_i}$ . The absolute values of these z-scores were thresholded at 3, and summed across voxels for a quality score for that image. The higher the resulting sum, the larger the number of voxels a image has that are  $\geq 3$  and the more likely the images are outliers. Using this metric it is possible to rank images, and allows for a more directed search for poor quality scans. These metrics are distributed in participant-specific text files along with the BASH scripts that implement the procedure.

## 3.2. Burner Pipeline

The Burner pipeline<sup>10</sup> used SPM8 [5] to process s-MRI data for voxel-based morphometry [31] style analyses.

### 3.2.1. Structural processing

Processing began by segmenting s-MRI images into GM and WM probability maps using SPM8's unified segmentation procedure, which iteratively registers the data to a template and performs tissue classification until both are optimized [32]. Next, SPM8's DARTEL toolbox [33] was used to register the s-MRI of all participants into a common space using an iterative method. Initially, all WM and GM maps were rigidly aligned, and the initial GM and WM templates were created by averaging all aligned maps. Then, all WM and GM maps were non-linearly registered to the templates. New templates were created after each such iteration of registration. The procedure was repeated six times (i.e. template creation and registration) to generate sharper templates and warping all participant WM and GM maps to the template space. The final (6th iteration) non-linear deformations were applied to each participant's GM probability maps to transform them into the space of the population average at  $1.5 \times 1.5 \times 1.5 \text{ mm}^3$  resolution and modulated to conserve the global tissue volumes after normalization. The resulting grey matter density maps are distributed as 3D NIfTI files (.nii).

---

<sup>10</sup><http://www.nitrc.org/plugins/mwiki/index.php/neurobureau:BurnerPipeline>

### 3.2.2. Quality Control

Stringent quality control was not applied to the data in order to accommodate different opinions on what constitutes poor quality data. Images for four participants were excluded after visual inspection by Dr. Chu because they were determined to be of insufficient quality for further processing.

### 3.3. NIAK Pipeline

The NIAK<sup>11</sup> is a collection of workflows, implemented in the Pipeline System for Octave and Matlab (PSOM) [34], that perform s-MRI and rs-fMRI processing using a combination of generic medical image processing modules, the MINC tools<sup>12</sup>, and custom Matlab/Octave scripts. The ADHD-200 Sample was processed using NIAK version 0.6.4.1, running on a server of the Canadian Brain Imaging Research Platform (CBRAIN) [35]. The NIAK is distributed as an open-source software under MIT license and the code is available on NITRC<sup>13</sup> and Github<sup>14</sup>. The processing scripts for ADHD200 are available on github<sup>15</sup>. The log files for execution were included with the derivatives and can be accessed through the PSOM interface<sup>16</sup>.

#### 3.3.1. Structural processing

The NIAK implements a variant of the CIVET pipeline [36]. Each individual s-MRI scan was first corrected for intensity non-uniformities [37] and the brain was extracted using a region growing algorithm [38]. Individual scans were then linearly registered (9 parameters) with the T1 MNI symmetric template [10], restricted to the brain with the previous mask. Note that, by selecting a symmetric template, it is possible to study functional connectivity between homotopic regions by simply flipping the  $x$  axis in stereotaxic space, e.g. [? ]. The s-MRI scans were again corrected for intensity non-uniformities in stereotaxic space, this time restricted to the template brain mask. An individual brain mask was extracted a second time on this improved image [38] and combined with template priors. An iterative non-linear registration was estimated between the linearly registered s-MRI and the template space, restricted to the brain mask [39]. A final brain mask of the T1 image in native space was extracted from the template brain mask by inverting the linear and non-linear transformation. This final mask was used for registration between rs-fMRI and sMRI data (see below). *Shared s-MRI outputs include:* non-uniformity corrected T1 volumes in native and stereotaxic space (after linear or non-linear transformations) at 1 mm isotropic resolution and brain masks in all spaces, in compressed NIFTI format (.nii.gz), as well as the linear and non-linear transformations from native to template space, as .xfm MINC files.

<sup>11</sup><http://www.nitrc.org/plugins/mwiki/index.php/neurobureau:NIAKPipeline>

<sup>12</sup><http://en.wikibooks.org/wiki/MINC>

<sup>13</sup>[http://www.nitrc.org/frs/?group\\_id=411](http://www.nitrc.org/frs/?group_id=411)

<sup>14</sup><https://github.com/SIMEXP/niak>

<sup>15</sup><https://github.com/SIMEXP/Projects/tree/master/adhd200>

<sup>16</sup>[http://psom.simexp-lab.org/how\\_to\\_use\\_psom.html](http://psom.simexp-lab.org/how_to_use_psom.html)

### 3.3.2. Functional processing

*Preprocessing.* The NIAK rs-fMRI pipeline involved removing the first three volumes to allow for magnetization to reach equilibrium, site-specific slice timing correction to the middle slice, and estimating the parameters of a rigid-body motion between each time frame and the median volume of a run, followed by spatial resampling across frames. The fMRI time series were then corrected from slow time drifts (high-pass filter with a 0.01 Hz cut-off, using a discrete cosines transform) and physiological noise using an automated labeling of noise components in an individual independent component analysis, ICA [40]. Finally, the median volume of one selected fMRI run for each subject was coregistered (restricted to the brain) with the corresponding s-MRI scan using Minctracc [39]. The rs-fMRI to s-MRI transform and s-MRI to template (non-linear) transform were combined to resample the rs-fMRI volumes into MNI space at a 3 mm isotropic resolution and the results were spatially smoothed with a 6 mm FWHM Gaussian filter. *Shared rs-fMRI outputs include:* denoised rs-fMRI volumes in MNI space (compressed 4D NIfTIs, *nii.gz*), the mean / standard deviation rs-fMRI volumes and brain mask in native and template space (*.nii.gz*), six parameter head motion traces (HDF5 *.mat* files) as well as individual ICA reports (*.pdf*).

*Time series for functionally defined regions.* A region-growing algorithm [41] based on the iterative merging of mutual-nearest-neighbours was implemented to generate functional brain parcellations. The spatial dimension was selected arbitrarily by specifying the size where the growing process should stop, measured in  $\text{mm}^3$ . Two parameters ( $1000 \text{ mm}^3$  and  $330 \text{ mm}^3$ ) were selected, resulting in the ROI1000 and ROI3000 parcellations, which include roughly 1000 and 3000 ROIs covering the grey matter, respectively. The region growing was applied on the time series concatenated across all participant's rs-fMRI data (after correction to zero mean and unit variance) from the KKI site (training data only). The homogeneity of regions was thus maximized on average for all subjects, and the regions were identical for all subjects. To limit the amount of memory required by the region-growing procedure, it was applied separately in each of the 116 areas of the AAL template [18]. The average time series for each ROI were extracted for both parcellations and are distributed in individual HDF5 (*.mat*) files. The ROI1000 and ROI3000 parcellations are also available as compressed 3D NIfTI files (*.nii.gz*).

### 3.3.3. Quality control

Outputs of the NIAK pipeline were subjected to a careful visual inspection and the results quality calls, along with head motion statistics, are available on the NIAK description page <sup>17</sup>. Estimates of the maximum motion (translation and rotation) between consecutive functional volumes for each rs-fMRI dataset were inspected to categorize the datasets as containing minimal ( $\leq 1 \text{ mm}$  or degree), moderate (2 to 3 mm or degrees) or severe motion ( $\geq 3 \text{ mm}$  or degrees). The individual results of the NIAK pipeline were visually inspected by M. Chouinard-Decortes for quality of the registration between rs-fMRI and s-MRI data,

<sup>17</sup>[http://www.nitrc.org/plugins/mwiki/index.php/neurobureau:NIAKPipeline#Quality\\_control\\_of\\_the\\_preprocessing\\_-\\_Training\\_dataset](http://www.nitrc.org/plugins/mwiki/index.php/neurobureau:NIAKPipeline#Quality_control_of_the_preprocessing_-_Training_dataset)

registration of s-MRI data to template space, and for common artefacts such as ghosting and signal loss. When substandard registration outcomes were identified, a parameter controlling the non-uniformity correction of the s-MRI was adjusted and the analysis was repeated until the coregistration results were satisfactory. To aid in further quality control, the motion statistics are distributed in comma-separated values format (.csv) for each site. Additionally the average structural and functional scans after linear and non-linear transformations and the average of all anatomical and functional brain masks for each site of the training and test samples are included as compressed nifti format (.nii.gz)[42].

Table 1: **ADHD-200 participants by site.** BHBH: Bradley Hospital/ Brown University, KKI: Kennedy Krieger Institute, NI: NeuroIMAGE sample, NYU: New York University Child Study Center, OHSU: Oregon Health Sciences University, PKU: Peking University, Pitt: University of Pittsburgh, WUSTL: Washington University at Saint Louis, avg.: average. \*Diagnostic labels are currently not available for BHBH, they have been listed as TDC in the table, but not included in the totals.

| Site          | Sex | TDC  |                  | ADHD |                  |
|---------------|-----|------|------------------|------|------------------|
|               |     | N    | Age Range (avg.) | N    | Age Range (avg.) |
| BHBH          | F   | 17*  | 8 - 18 (13.8)    | 0    | -                |
|               | M   | 9*   | 12 - 18 (16.1)   | 0    | -                |
| KKI           | F   | 28   | 8 - 12 (10.3)    | 10   | 8 - 13 (9.9)     |
|               | M   | 41   | 8 - 13 (10.4)    | 15   | 8 - 13 (10.1)    |
| NI            | F   | 25   | 12 - 26 (18.8)   | 5    | 12 - 20 (15.2)   |
|               | M   | 12   | 13 - 25 (17.9)   | 31   | 11 - 21 (17.1)   |
| NYU           | F   | 55   | 7 - 18 (12.2)    | 34   | 7 - 17 (10.1)    |
|               | M   | 56   | 7 - 18 (12.0)    | 117  | 7 - 18 (11.2)    |
| OHSU          | F   | 40   | 7 - 12 (9.0)     | 13   | 7 - 11 (8.9)     |
|               | M   | 30   | 7 - 12 (9.5)     | 30   | 7 - 12 (8.9)     |
| PKU           | F   | 59   | 8 - 15 (10.9)    | 10   | 9 - 16 (10.9)    |
|               | M   | 84   | 8 - 15 (11.8)    | 92   | 8 - 17 (12.2)    |
| Pitt          | F   | 44   | 10 - 20 (15.7)   | 1    | 15               |
|               | M   | 50   | 10 - 19 (14.5)   | 3    | 14 - 17 (15.7)   |
| WUSTL         | F   | 28   | 7 - 22 (11.3)    | 0    | -                |
|               | M   | 33   | 7 - 22 (11.5)    | 0    | -                |
| <b>Totals</b> | F   | 279* | 7 - 26 (12.3)    | 73   | 7 - 20 (10.4)    |
|               | M   | 306* | 7 - 25 (12.1)    | 288  | 7 - 21 (11.9)    |

#### 4. Usage recommendations

The ADHD-200 Sample was originally created to identify rs-fMRI based biomarkers of ADHD; however, the dataset provides ample opportunity for further analyses [43]. With 585 TDC participants between the ages of 7 and 26, and the inclusion of intelligence measures, the ADHD-200 Preprocessed is a valuable resource for mapping developmental trajectories



[44–46] and other sources of inter-individual variation [47]. Perhaps most exciting are new methods that cluster individuals based on connectivity profiles [48, 49], which are providing new hope for using neuroimaging data to parse the heterogeneity within mental health disorders [50]. One of the outstanding needs for neuroimaging, and connectomics in particular, is the development and validation of new analytical tools and processing strategies [43, 51, 52]. In the service of this aim, the ADHD-200 Preprocessed repository has the necessary components to become a benchmark dataset for evaluating new tools as they are proposed.

The two biggest challenges for using the ADHD-200 Preprocessed data are head motion [53–58] and inter-site variation in the acquisition equipment, parameters, and experimental procedures [59, 60]. A variety of different approaches have been proposed for addressing head motion in hyperkinetic populations [53, 61], and in the ADHD-200 Sample in particular [56], that should be considered when analyzing the data. At the very least, some statistic that characterizes individual motion (such as root mean square deviation [62]) should be included as a nuisance regressor in the group-level model [55, 57]. Differences in the manner in which data was collected at each site can introduce addition and multiplicative effects (batch effects) to the data, which may obscure the underlying biological signal [59, 60]. Including a regressor for acquisition protocol (see Tables 2 and 3 for a summary of the different protocols), the average pairwise correlation between all regions in the brain (GCOR) [63], or the whole-brain average of the feature under inquiry [60], have all been shown to be effective for dealing with inter-site variation.

Beyond personal ideology, or the availability of particular features, there is no clear reason to prefer one pipeline over the other. Hopefully, the presence of multiple pipelines will enable researchers to compare the robustness of their tools or analysis results to different processing choices. It isn’t clear which of the parcellations provide the optimal time series, although there is growing consensus that functionally-defined brain regions represent the brain’s intrinsic connectivity better than structurally-defined parcellations [25, 64, 65]. Similarly, it isn’t clear which scale of parcellation is optimal. While smaller parcels tend to be better at representing connectivity present at the voxel-scale [25, 41, 65], fewer parcels may be more manageable or adapted for specific algorithms [66, 67, e.g.].

## 5. Conclusions

The ADHD-200 Preprocessed initiative was successful in its primary objectives: the derivatives shared in the repository were effectively used by many researchers during and after the ADHD-200 Global Competition, with over 10,500 downloads by more than 600 users, as well as 49 resulting publications [34, 59, 68–114], three PhD theses [115–117], three master’s dissertations [118–120] and one patent [121] derived from the release in just over three years, with further publications in press or under review. The resource also expanded the boundaries of the traditional neuroimaging community, with several publications in engineering and statistics journals that do not routinely feature neuroimaging applications [e.g. 68, 69, 71, 72, 75–78, 83, 95–97, 99, 108, 109, 111, 112]. In particular, the winning

team of the ADHD-200 Global Competition was based at the Johns Hopkins Biostatistics Department and used ADHD-200 Preprocessed to develop their diagnostic algorithm [91].

The impact of the ADHD-200 Preprocessed repository demonstrated the need for reducing computational barriers to participation in discovery neuroscience, including but not limited to machine learning competitions based on neuroimaging data. We do not plan to expand or update the ADHD-200 Preprocessed release as such, which we hope will continue to serve as a legacy benchmark dataset. We still believe that a much larger-scale effort will be necessary to unlock the full potential of openly shared neuroimaging data in the service of accelerating neuroimaging research. Current initiatives include a larger number of alternative analytical workflows as well as a careful harmonization of processing, quality control, and data packaging strategies. Our hope is that ADHD-200 Preprocessed and future related efforts will critically help fMRI researchers to identify optimal analytical paths for a given task.

*Acknowledgements.* The authors would like to thank the ADHD-200 Consortium for assembling and sharing the ADHD-200 Sample and for hosting the ADHD-200 Global competition. The Athena would like to thank the developers of AFNI and FSL, and the Advanced Research Computing at Virginia Tech for computational support. The scripts used to calculate ReHo were generously provided by Dr. Xinian Zuo. The Burner would like to thank the developers of SPM. The NIAK would like to thank the developers of MINC tools, the CIVET pipeline, and the CBRAIN computational infrastructure.

## References

- [1] M. P. Milham, D. Fair, M. Mennes, S. H. Mostofsky, The adhd-200 consortium: a model to advance the translational potential of neuroimaging in clinical neuroscience, *Frontiers in Systems Neuroscience* 6 (62), ISSN 1662-5137, doi:\bibinfo{doi}{10.3389/fnsys.2012.00062}, URL [http://www.frontiersin.org/systems\\_neuroscience/10.3389/fnsys.2012.00062/full](http://www.frontiersin.org/systems_neuroscience/10.3389/fnsys.2012.00062/full).
- [2] M. Mennes, B. B. Biswal, F. X. Castellanos, M. P. Milham, Making data sharing work: the FCP/INDI experience, *Neuroimage* 82 (2013) 683–691.
- [3] R. W. Cox, AFNI: software for analysis and visualization of functional magnetic resonance neuroimages, *Computers and Biomedical research* 29 (3) (1996) 162–173.
- [4] S. M. Smith, M. Jenkinson, M. W. Woolrich, C. F. Beckmann, T. E. Behrens, H. Johansen-Berg, P. R. Bannister, M. De Luca, I. Drobnjak, D. E. Flitney, et al., Advances in functional and structural MR image analysis and implementation as FSL, *Neuroimage* 23 (2004) S208–S219.
- [5] J. Ashburner, G. Barnes, C. Chen, J. Daunizeau, G. Flandin, K. Friston, D. Gitelman, S. Kiebel, J. Kilner, V. Litvak, et al., SPM8 manual, Functional Imaging Laboratory, Institute of Neurology .
- [6] P. Bellec, F. M. Carbonell, V. Perlberg, C. Lepage, O. Lyttelton, V. Fonov, A. Janke, J. Tohka, A. C. Evans, A neuroimaging analysis kit for Matlab and Octave, in: *Proceedings of the 17th International Conference on Functional Mapping of the Human Brain*, In Press+, 2011.
- [7] M. Bastian, S. Heymann, M. Jacomy, et al., Gephi: an open source software for exploring and manipulating networks., *ICWSM* 8 (2009) 361–362.
- [8] S. M. Smith, Fast robust automated brain extraction, *Hum Brain Mapp* 17 (3) (2002) 143–155.
- [9] Y. Zhang, M. Brady, S. Smith, Segmentation of brain MR images through a hidden Markov random field model and the expectation-maximization algorithm, *IEEE Trans Med Imaging* 20 (1) (2001) 45–57.
- [10] V. Fonov, A. C. Evans, K. Botteron, C. R. Almli, R. C. McKinstry, D. L. Collins, B. D. C. Group, et al., Unbiased average age-appropriate atlases for pediatric studies, *NeuroImage* 54 (1) (2011) 313–327.

- [11] M. Jenkinson, P. Bannister, M. Brady, S. Smith, Improved optimization for the robust and accurate linear registration and motion correction of brain images, *Neuroimage* 17 (2) (2002) 825–841.
- [12] J. L. Andersson, M. Jenkinson, S. Smith, Non-linear registration, aka Spatial normalisation FMRIB technical report TR07JA2, FMRIB Analysis Group of the University of Oxford .
- [13] R. W. Cox, A. Jesmanowicz, Real-time 3D image registration for functional MRI, *Magn Reson Med* 42 (6) (1999) 1014–1018.
- [14] T. E. Lund, K. H. Madsen, K. Sidaros, W. L. Luo, T. E. Nichols, Non-white noise in fMRI: does modelling have an impact?, *Neuroimage* 29 (1) (2006) 54–66.
- [15] M. D. Fox, A. Z. Snyder, J. L. Vincent, M. Corbetta, D. C. Van Essen, M. E. Raichle, The human brain is intrinsically organized into dynamic, anticorrelated functional networks, *Proc. Natl. Acad. Sci. U.S.A.* 102 (27) (2005) 9673–9678.
- [16] B. Biswal, F. Z. Yetkin, V. M. Haughton, J. S. Hyde, Functional connectivity in the motor cortex of resting human brain using echo-planar MRI, *Magn Reson Med* 34 (4) (1995) 537–541.
- [17] D. Cordes, V. M. Haughton, K. Arfanakis, J. D. Carew, P. A. Turski, C. H. Moritz, M. A. Quigley, M. E. Meyerand, Frequencies contributing to functional connectivity in the cerebral cortex in "resting-state" data, *AJNR Am J Neuroradiol* 22 (7) (2001) 1326–1333.
- [18] N. Tzourio-Mazoyer, B. Landeau, D. Papathanassiou, F. Crivello, O. Etard, N. Delcroix, B. Mazoyer, M. Joliot, Automated anatomical labeling of activations in SPM using a macroscopic anatomical parcellation of the MNI MRI single-subject brain, *Neuroimage* 15 (1) (2002) 273–289.
- [19] S. B. Eickhoff, K. E. Stephan, H. Mohlberg, C. Grefkes, G. R. Fink, K. Amunts, K. Zilles, A new SPM toolbox for combining probabilistic cytoarchitectonic maps and functional imaging data, *Neuroimage* 25 (4) (2005) 1325–1335.
- [20] J. M. Goldstein, L. J. Seidman, N. Makris, T. Ahern, L. M. O'Brien, V. S. Caviness, D. N. Kennedy, S. V. Faraone, M. T. Tsuang, Hypothalamic abnormalities in schizophrenia: sex effects and genetic vulnerability, *Biol. Psychiatry* 61 (8) (2007) 935–945.
- [21] R. S. Desikan, F. Segonne, B. Fischl, B. T. Quinn, B. C. Dickerson, D. Blacker, R. L. Buckner, A. M. Dale, R. P. Maguire, B. T. Hyman, M. S. Albert, R. J. Killiany, An automated labeling system for subdividing the human cerebral cortex on MRI scans into gyral based regions of interest, *Neuroimage* 31 (3) (2006) 968–980.
- [22] N. Makris, J. M. Goldstein, D. Kennedy, S. M. Hodge, V. S. Caviness, S. V. Faraone, M. T. Tsuang, L. J. Seidman, Decreased volume of left and total anterior insular lobule in schizophrenia, *Schizophr. Res.* 83 (2-3) (2006) 155–171.
- [23] J. A. Frazier, S. Chiu, J. L. Breeze, N. Makris, N. Lange, D. N. Kennedy, M. R. Herbert, E. K. Bent, V. K. Koneru, M. E. Dieterich, S. M. Hodge, S. L. Rauch, P. E. Grant, B. M. Cohen, L. J. Seidman, V. S. Caviness, J. Biederman, Structural brain magnetic resonance imaging of limbic and thalamic volumes in pediatric bipolar disorder, *Am J Psychiatry* 162 (7) (2005) 1256–1265.
- [24] J. L. Lancaster, M. G. Woldorff, L. M. Parsons, M. Liotti, C. S. Freitas, L. Rainey, P. V. Kochunov, D. Nickerson, S. A. Mikiten, P. T. Fox, Automated Talairach atlas labels for functional brain mapping, *Human brain mapping* 10 (3) (2000) 120–131.
- [25] R. C. Craddock, G. A. James, P. E. Holtzheimer, X. P. Hu, H. S. Mayberg, A whole brain fMRI atlas generated via spatially constrained spectral clustering, *Human brain mapping* 33 (8) (2012) 1914–1928.
- [26] A. M. Dale, B. Fischl, M. I. Sereno, Cortical surface-based analysis. I. Segmentation and surface reconstruction, *Neuroimage* 9 (2) (1999) 179–194.
- [27] S. M. Smith, P. T. Fox, K. L. Miller, D. C. Glahn, P. M. Fox, C. E. Mackay, N. Filippini, K. E. Watkins, R. Toro, A. R. Laird, et al., Correspondence of the brain's functional architecture during activation and rest, *Proceedings of the National Academy of Sciences* 106 (31) (2009) 13040–13045.
- [28] C. Beckmann, C. Mackay, N. Filippini, S. Smith, Group comparison of resting-state {fMRI} data using multi-subject {ICA} and dual regression, *NeuroImage* 47, Supplement 1 (2009) S148 –, ISSN 1053-8119, doi:\bibinfo{doi}{http://dx.doi.org/10.1016/S1053-8119(09)71511-3}, URL <http://www.sciencedirect.com/science/article/pii/S1053811909715113>, organization for Human

- Brain Mapping 2009 Annual Meeting.
- [29] Q. H. Zou, C. Z. Zhu, Y. Yang, X. N. Zuo, X. Y. Long, Q. J. Cao, Y. F. Wang, Y. F. Zang, An improved approach to detection of amplitude of low-frequency fluctuation (ALFF) for resting-state fMRI: fractional ALFF, *J. Neurosci. Methods* 172 (1) (2008) 137–141.
- [30] B. B. S. M. G. Kendall, The Problem of m Rankings, *The Annals of Mathematical Statistics* 10 (3) (1939) 275–287, ISSN 00034851, URL <http://www.jstor.org/stable/2235668>.
- [31] J. Ashburner, K. J. Friston, Voxel-based morphometry—the methods, *Neuroimage* 11 (6 Pt 1) (2000) 805–821.
- [32] J. Ashburner, K. J. Friston, Unified segmentation, *Neuroimage* 26 (3) (2005) 839–851.
- [33] J. Ashburner, A fast diffeomorphic image registration algorithm, *Neuroimage* 38 (1) (2007) 95–113.
- [34] P. Bellec, S. Lavoie-Courchesne, P. Dickinson, J. P. Lerch, A. P. Zijdenbos, A. C. Evans, The pipeline system for Octave and Matlab (PSOM): a lightweight scripting framework and execution engine for scientific workflows., *Frontiers in neuroinformatics* 6, ISSN 1662-5196, doi:\bibinfo{doi}{10.3389/fninf.2012.00007}, URL <http://dx.doi.org/10.3389/fninf.2012.00007>.
- [35] T. Sherif, P. Rioux, M.-E. Rousseau, N. Kassis, N. Beck, R. Adalat, S. Das, T. Glatard, A. C. Evans, CBRAIN: a web-based, distributed computing platform for collaborative neuroimaging research, *Frontiers in neuroinformatics* 8.
- [36] Y. Ad-Dabbagh, O. Lyttelton, J. Muehlboeck, C. Lepage, D. Einarson, K. Mok, O. Ivanov, R. Vincent, J. Lerch, E. Fombonne, et al., The CIVET image-processing environment: a fully automated comprehensive pipeline for anatomical neuroimaging research, in: *Proceedings of the 12th annual meeting of the organization for human brain mapping*, M. Corbetta, S45, 2006.
- [37] J. G. Sled, A. P. Zijdenbos, A. C. Evans, A nonparametric method for automatic correction of intensity nonuniformity in MRI data, *Medical Imaging, IEEE Transactions on* 17 (1) (1998) 87–97.
- [38] J. G. Park, C. Lee, Skull stripping based on region growing for magnetic resonance brain images, *NeuroImage* 47 (4) (2009) 1394–1407.
- [39] D. L. Collins, P. Neelin, T. M. Peters, A. C. Evans, Automatic 3D intersubject registration of MR volumetric data in standardized Talairach space., *Journal of computer assisted tomography* 18 (2) (1994) 192–205.
- [40] V. Perlberg, P. Bellec, J.-L. Anton, M. Péligrini-Issac, J. Doyon, H. Benali, CORSICA: correction of structured noise in fMRI by automatic identification of ICA components, *Magnetic resonance imaging* 25 (1) (2007) 35–46.
- [41] P. Bellec, V. Perlberg, S. Jbabdi, M. Péligrini-Issac, J.-L. Anton, J. Doyon, H. Benali, Identification of large-scale networks in the brain using fMRI, *Neuroimage* 29 (4) (2006) 1231–1243.
- [42] S. Lavoie-Courchesne, P. Rioux, F. Chouinard-Decorte, T. Sherif, M.-E. Rousseau, S. Das, R. Adalat, J. Doyon, C. Craddock, D. Margulies, et al., Integration of a neuroimaging processing pipeline into a pan-canadian computing grid, in: *Journal of Physics: Conference Series*, vol. 341, IOP Publishing, 012032, 2012.
- [43] R. C. Craddock, R. L. Tungaraza, M. P. Milham, Connectomics and new approaches for analyzing human brain functional connectivity, *Gigascience* 4 (2015) 13.
- [44] N. U. Dosenbach, B. Nardos, A. L. Cohen, D. A. Fair, J. D. Power, J. A. Church, S. M. Nelson, G. S. Wig, A. C. Vogel, C. N. Lessov-Schlaggar, K. A. Barnes, J. W. Dubis, E. Feczko, R. S. Coalson, J. R. Pruett, D. M. Barch, S. E. Petersen, B. L. Schlaggar, Prediction of individual brain maturity using fMRI, *Science* 329 (5997) (2010) 1358–1361.
- [45] X. N. Zuo, C. Kelly, A. Di Martino, M. Mennes, D. S. Margulies, S. Bangaru, R. Grzadzinski, A. C. Evans, Y. F. Zang, F. X. Castellanos, M. P. Milham, Growing together and growing apart: regional and sex differences in the lifespan developmental trajectories of functional homotopy, *J. Neurosci.* 30 (45) (2010) 15034–15043.
- [46] A. Di Martino, D. A. Fair, C. Kelly, T. D. Satterthwaite, F. X. Castellanos, M. E. Thomason, R. C. Craddock, B. Luna, B. L. Leventhal, X. N. Zuo, M. P. Milham, Unraveling the miswired connectome: a developmental perspective, *Neuron* 83 (6) (2014) 1335–1353.
- [47] C. Kelly, B. B. Biswal, R. C. Craddock, F. X. Castellanos, M. P. Milham, Characterizing variation in



- the functional connectome: promise and pitfalls, *Trends Cogn. Sci. (Regul. Ed.)* 16 (3) (2012) 181–188.
- [48] O. Miranda-Dominguez, B. D. Mills, S. D. Carpenter, K. A. Grant, C. D. Kroenke, J. T. Nigg, D. A. Fair, Connectotyping: Model Based Fingerprinting of the Functional Connectome, *PLoS ONE* 9 (11) (2014) e111048, doi:\bibinfo{doi}{10.1371/journal.pone.0111048}, URL <http://dx.doi.org/10.1371%2Fjournal.pone.0111048>.
  - [49] E. S. Finn, X. Shen, D. Scheinost, M. D. Rosenberg, J. Huang, M. M. Chun, X. Papademetris, R. T. Constable, Functional connectome fingerprinting: identifying individuals using patterns of brain connectivity, *Nat. Neurosci.* 18 (11) (2015) 1664–1671.
  - [50] F. X. Castellanos, A. Di Martino, R. C. Craddock, A. D. Mehta, M. P. Milham, Clinical applications of the functional connectome, *Neuroimage* 80 (2013) 527–540.
  - [51] R. C. Craddock, M. P. Milham, S. M. LaConte, Predicting intrinsic brain activity, *Neuroimage* 82 (2013) 127–136.
  - [52] G. Varoquaux, R. C. Craddock, Learning and comparing functional connectomes across subjects, *Neuroimage* 80 (2013) 405–415.
  - [53] J. D. Power, K. A. Barnes, A. Z. Snyder, B. L. Schlaggar, S. E. Petersen, Spurious but systematic correlations in functional connectivity MRI networks arise from subject motion, *Neuroimage* 59 (3) (2012) 2142–2154.
  - [54] K. R. Van Dijk, M. R. Sabuncu, R. L. Buckner, The influence of head motion on intrinsic functional connectivity MRI, *Neuroimage* 59 (1) (2012) 431–438.
  - [55] T. D. Satterthwaite, D. H. Wolf, J. Loughhead, K. Ruparel, M. A. Elliott, H. Hakonarson, R. C. Gur, R. E. Gur, Impact of in-scanner head motion on multiple measures of functional connectivity: relevance for studies of neurodevelopment in youth, *Neuroimage* 60 (1) (2012) 623–632.
  - [56] D. A. Fair, J. T. Nigg, S. Iyer, D. Bathula, K. L. Mills, N. U. Dosenbach, B. L. Schlaggar, M. Mennes, D. Gutman, S. Bangaru, J. K. Buitelaar, D. P. Dickstein, A. Di Martino, D. N. Kennedy, C. Kelly, B. Luna, J. B. Schweitzer, K. Velanova, Y. F. Wang, S. Mostofsky, F. X. Castellanos, M. P. Milham, Distinct neural signatures detected for ADHD subtypes after controlling for micro-movements in resting state functional connectivity MRI data, *Front Syst Neurosci* 6 (2012) 80.
  - [57] C. G. Yan, B. Cheung, C. Kelly, S. Colcombe, R. C. Craddock, A. Di Martino, Q. Li, X. N. Zuo, F. X. Castellanos, M. P. Milham, A comprehensive assessment of regional variation in the impact of head micromovements on functional connectomics, *Neuroimage* 76 (2013) 183–201.
  - [58] C. G. Yan, R. C. Craddock, Y. He, M. P. Milham, Addressing head motion dependencies for small-world topologies in functional connectomics, *Front Hum Neurosci* 7 (2013) 910.
  - [59] E. Olivetti, S. Greiner, P. Avesani, ADHD diagnosis from multiple data sources with batch effects., *Frontiers in systems neuroscience* 6 (2012) 70, ISSN 1662-5137, URL <http://www.pubmedcentral.nih.gov/articlerender.fcgi?artid=3465911&tool=pmcentrez&rendertype=abstract>.
  - [60] C. G. Yan, R. C. Craddock, X. N. Zuo, Y. F. Zang, M. P. Milham, Standardizing the intrinsic brain: towards robust measurement of inter-individual variation in 1000 functional connectomes, *Neuroimage* 80 (2013) 246–262.
  - [61] T. D. Satterthwaite, M. A. Elliott, R. T. Gerraty, K. Ruparel, J. Loughhead, M. E. Calkins, S. B. Eickhoff, H. Hakonarson, R. C. Gur, R. E. Gur, D. H. Wolf, An improved framework for confound regression and filtering for control of motion artifact in the preprocessing of resting-state functional connectivity data, *Neuroimage* 64 (2013) 240–256.
  - [62] M. Jenkinson, Measuring Transformation Error by RMS Deviation, Internal Technical Report TR99MJ1, Oxford Centre for Functional Magnetic Resonance Imaging of the Brain, Department of Clinical Neurology, Oxford University, Oxford, UK, 1999.
  - [63] Z. S. Saad, R. C. Reynolds, H. J. Jo, S. J. Gotts, G. Chen, A. Martin, R. W. Cox, Correcting brain-wide correlation differences in resting-state fMRI, *Brain Connect* 3 (4) (2013) 339–352.
  - [64] T. Blumensath, S. Jbabdi, M. F. Glasser, D. C. Van Essen, K. Ugurbil, T. E. Behrens, S. M. Smith, Spatially constrained hierarchical parcellation of the brain with resting-state fMRI, *Neuroimage* 76 (2013) 313–324.
  - [65] B. Thirion, G. Varoquaux, E. Dohmatob, J. B. Poline, Which fMRI clustering gives good brain

- parcellations?, *Front Neurosci* 8 (2014) 167.
- [66] V. Michel, A. Gramfort, G. Varoquaux, E. Eger, C. Keribin, B. Thirion, A supervised clustering approach for fMRI-based inference of brain states, *Pattern Recognition* 45 (6) (2012) 2041–2049.
  - [67] P. Bellec, Y. Benhajali, F. Carbonell, C. Dansereau, G. Albouy, M. Pelland, C. Craddock, O. Colignon, J. Doyon, E. Stip, et al., Impact of the resolution of brain parcels on connectome-wide association studies in fMRI, *NeuroImage* 123 (2015) 212–228.
  - [68] B. Rangarajan, S. Suresh, B. S. Mahanand, Identification of Potential Biomarkers in the Hippocampus Region for the Diagnosis of ADHD using PBL-McRBFN Approach, 13th International Conference on Control, Automation, Robotics and Vision, (ICARCV 2014) 2.
  - [69] S.-F. Liang, T.-H. Hsieh, P.-T. Chen, M.-L. Wu, C.-C. Kung, C.-Y. Lin, F.-Z. Shaw, Differentiation between resting-state fMRI data from ADHD and normal subjects: Based on functional connectivity and machine learning, in: 2012 International conference on Fuzzy Theory and Its Applications (iFUZZY2012), IEEE, 294–298, URL <http://ieeexplore.ieee.org/articleDetails.jsp?arnumber=6409719>, 2012.
  - [70] A. Tabas, E. Balaguer-Ballester, L. Igual, Spatial discriminant ICA for RS-fMRI characterisation, in: 2014 International Workshop on Pattern Recognition in Neuroimaging, IEEE, 1–4, URL <http://ieeexplore.ieee.org.proxy.wexler.hunter.cuny.edu/articleDetails.jsp?arnumber=6858546>, 2014.
  - [71] B. Rangarajan, K. Subramanian, S. Suresh, Importance of phenotypic information in ADHD diagnosis, 2015 International Conference on Cognitive Computing and Information Processing (CCIP) (MARCH) (2015) 1–6, doi:\bibinfo{doi}{10.1109/CCIP.2015.7100722}, URL <http://ieeexplore.ieee.org/lpdocs/epic03/wrapper.htm?arnumber=7100722>.
  - [72] B. S. Mahanand, R. Savitha, S. Suresh, Computer Aided Diagnosis of ADHD Using Brain Magnetic Resonance Images, in: S. Craneffeld, A. Nayak (Eds.), *AI 2013: Advances in Artificial Intelligence*, vol. 8272 of *Lecture Notes in Computer Science*, Springer International Publishing, Cham, ISBN 978-3-319-03679-3, 386–395, doi:\bibinfo{doi}{10.1007/978-3-319-03680-9}, URL <http://link.springer.com/10.1007/978-3-319-03680-9>, 2013.
  - [73] M. Lifshitz, D. S. Margulies, A. Raz, Lengthy and Expensive? Why the Future of Diagnostic Neuroimaging May Be Faster, Cheaper, and More Collaborative Than We Think, *AJOB Neuroscience* 3 (4) (2012) 48–50, ISSN 2150-7740, URL <http://www.tandfonline.com/doi/abs/10.1080/21507740.2012.721466?journalCode=uabn20>.
  - [74] A. Fujita, D. Y. Takahashi, A. G. Patriota, J. R. Sato, A statistical test to identify differences in clustering structures, ArXiv e-prints URL <http://webcache.googleusercontent.com/search?q=cache:hW0LJGfI6mUJ:my.arxiv.org/arxiv/FilterServlet/abs/1311.6732+{\&}cd=1{\&}hl=en{\&}ct=clnk{\&}gl=ushttp://arxiv.org/abs/1311.6732http://webcache.googleusercontent.com/search?q=cache:hW0LJGfI6mUJ:my.arxiv.org/arxiv/>.
  - [75] X. Ji, W. Cheng, J. Zhang, T. Ge, L. Sun, Y. Wang, J. Feng, Increased Coupling in the Saliency Network is the main cause/effect of Attention Deficit Hyperactivity Disorder, ArXiv e-prints URL <http://arxiv.org/abs/1112.3496>.
  - [76] L. Li, X. Zhang, Parsimonious Tensor Response Regression, ArXiv e-prints (2015) 1501.07815doi:\bibinfo{doi}{arXiv:1501.07815}.
  - [77] X. Li, H. Zhou, L. Li, Tucker Tensor Regression and Neuroimaging Analysis, ArXiv e-prints URL <http://arxiv.org/abs/1304.5637>.
  - [78] W. Liu, X. Luo, High-dimensional Sparse Precision Matrix Estimation via Sparse Column Inverse Operator, ArXiv e-prints (2012) 30URL <http://arxiv.org/abs/1203.3896>.
  - [79] A. dos Santos Siqueira, C. E. Biazoli Junior, W. E. Comfort, L. A. Rohde, J. R. Sato, Abnormal Functional Resting-State Networks in ADHD: Graph Theory and Pattern Recognition Analysis of fMRI Data, *BioMed Research International* 2014 (2014) 1–10, ISSN 2314-6133, doi:\bibinfo{doi}{10.1155/2014/380531}, URL <http://www.hindawi.com/journals/bmri/2014/380531/>.
  - [80] E. Olivetti, S. Greiner, P. Avesani, Statistical independence for the evaluation of classifier-based diagnosis, *Brain Informatics* ISSN 2198-4018, doi:\bibinfo{doi}{10.1007/s40708-014-0007-6}, URL

- <http://link.springer.com/10.1007/s40708-014-0007-6>.
- [81] X. Han, Y. Zhong, L. He, P. S. Yu, L. Zhang, The Unsupervised Hierarchical Convolutional Sparse Auto-Encoder for Neuroimaging Data Classification, in: Y. Guo, K. Friston, F. Aldo, S. Hill, H. Peng (Eds.), *Brain Informatics and Health*, Springer International Publishing, 156–166, doi:\bibinfo{doi}{10.1007/978-3-319-23344-4}\_{16}, URL [http://link.springer.com/10.1007/978-3-319-23344-4\\_{16}](http://link.springer.com/10.1007/978-3-319-23344-4_{16}), 2015.
  - [82] X. Wang, Y. Jiao, T. Tang, H. Wang, Z. Lu, Altered regional homogeneity patterns in adults with attention-deficit hyperactivity disorder., *European journal of radiology* 82 (9) (2013) 1552–7, ISSN 1872-7727, URL <http://www.sciencedirect.com/science/article/pii/S0720048X13002040>.
  - [83] K. Subramanian, A. K. Das, S. Sundaram, S. Ramasamy, A meta-cognitive interval type-2 fuzzy inference system and its projection based learning algorithm, *Evolving Systems* ISSN 1868-6478, doi:\bibinfo{doi}{10.1007/s12530-013-9102-9}, URL <http://link.springer.com/10.1007/s12530-013-9102-9>.
  - [84] S. Dey, A. R. Rao, M. Shah, Attributed graph distance measure for automatic detection of attention deficit hyperactive disordered subjects, *Frontiers in Neural Circuits* 8, ISSN 1662-5110, URL <http://journal.frontiersin.org/Journal/10.3389/fncir.2014.00064/abstract>.
  - [85] J. W. Bohland, S. Saperstein, F. Pereira, J. Rapin, L. Grady, Network, anatomical, and non-imaging measures for the prediction of ADHD diagnosis in individual subjects., *Frontiers in systems neuroscience* 6 (2012) 78, ISSN 1662-5137, URL <http://www.pubmedcentral.nih.gov/articlerender.fcgi?artid=3527894{\&}tool=pmcentrez{\&}rendertype=abstract>.
  - [86] C.-W. Chang, C.-C. Ho, J.-H. Chen, ADHD classification by a texture analysis of anatomical brain MRI data., *Frontiers in systems neuroscience* 6 (2012) 66, ISSN 1662-5137, URL <http://www.frontiersin.org/Journal/10.3389/fnsys.2012.00066/abstract>.
  - [87] W. Cheng, X. Ji, J. Zhang, J. Feng, Individual classification of ADHD patients by integrating multi-scale neuroimaging markers and advanced pattern recognition techniques., *Frontiers in systems neuroscience* 6 (2012) 58, ISSN 1662-5137, URL <http://www.pubmedcentral.nih.gov/articlerender.fcgi?artid=3412279{\&}tool=pmcentrez{\&}rendertype=abstract>.
  - [88] J. B. Colby, J. D. Rudie, J. A. Brown, P. K. Douglas, M. S. Cohen, Z. Shehzad, Insights into multi-modal imaging classification of ADHD., *Frontiers in systems neuroscience* 6 (2012) 59, ISSN 1662-5137, URL <http://www.frontiersin.org/Journal/10.3389/fnsys.2012.00059/abstract>.
  - [89] D. Dai, J. Wang, J. Hua, H. He, Classification of ADHD children through multimodal magnetic resonance imaging., *Frontiers in systems neuroscience* 6 (2012) 63, ISSN 1662-5137, URL <http://www.pubmedcentral.nih.gov/articlerender.fcgi?artid=3432508{\&}tool=pmcentrez{\&}rendertype=abstract>.
  - [90] S. Dey, A. R. Rao, M. Shah, Exploiting the brain’s network structure in identifying ADHD subjects., *Frontiers in systems neuroscience* 6 (2012) 75, ISSN 1662-5137, URL <http://www.frontiersin.org/Journal/10.3389/fnsys.2012.00075/abstract>.
  - [91] A. Eloyan, J. Muschelli, M. B. Nebel, H. Liu, F. Han, T. Zhao, A. D. Barber, S. Joel, J. J. Pekar, S. H. Mostofsky, B. Caffo, Automated diagnoses of attention deficit hyperactive disorder using magnetic resonance imaging., *Frontiers in systems neuroscience* 6 (2012) 61, ISSN 1662-5137, URL <http://www.pubmedcentral.nih.gov/articlerender.fcgi?artid=3431009{\&}tool=pmcentrez{\&}rendertype=abstract>.
  - [92] J. R. Sato, M. Q. Hoexter, A. Fujita, L. A. Rohde, Evaluation of pattern recognition and feature extraction methods in ADHD prediction., *Frontiers in systems neuroscience* 6 (2012) 68, ISSN 1662-5137, doi:\bibinfo{doi}{10.3389/fnsys.2012.00068}, URL <http://www.pubmedcentral.nih.gov/articlerender.fcgi?artid=3449288{\&}tool=pmcentrez{\&}rendertype=abstract>.
  - [93] S. Carmona, E. Hoekzema, F. X. Castellanos, D. García-García, A. Lage-Castellanos, K. R. A. Van Dijk, F. J. Navas-Sánchez, K. Martínez, M. Desco, J. Sepulcre, Sensation-to-cognition cortical streams in attention-deficit/hyperactivity disorder., *Human brain mapping* 36 (7) (2015) 2544–57, ISSN 1097-0193, URL <http://www.pubmedcentral.nih.gov/articlerender.fcgi?artid=4484811{\&}tool=pmcentrez{\&}rendertype=abstract>.

- [94] S. Carmona, E. Hoekzema, F. X. Castellanos, D. García-García, A. Lage-Castellanos, K. R. Van Dijk, F. J. Navas-Sánchez, K. Martínez, M. Desco, J. Sepulcre, Sensation-to-cognition cortical streams in attention-deficit/hyperactivity disorder, *Human Brain Mapping* 00 (March) (2015) n/a–n/a, ISSN 10659471, doi:\bibinfo{doi}{10.1002/hbm.22790}, URL <http://doi.wiley.com/10.1002/hbm.22790>.
- [95] M. Hou, B. Chaib-draa, HIERARCHICAL TUCKER TENSOR REGRESSION : APPLICATION TO BRAIN IMAGING DATA ANALYSIS, in: *IEEE International Conference on Image Processing (ICIP '15)*, Quebec, Canada, 2015.
- [96] G. Deshpande, P. Wang, D. Rangaprakash, B. Wilamowski, Fully Connected Cascade Artificial Neural Network Architecture for Attention Deficit Hyperactivity Disorder Classification From Functional Magnetic Resonance Imaging Data, *IEEE Transactions on Cybernetics* 45 (12) (2015) 2668–2679, ISSN 2168-2267, doi:\bibinfo{doi}{10.1109/TCYB.2014.2379621}, URL <http://ieeexplore.ieee.org/lpdocs/epic03/wrapper.htm?arnumber=7001645>.
- [97] Y. She, Y. He, D. Wu, Learning Topology and Dynamics of Large Recurrent Neural Networks, *IEEE Transactions on Signal Processing* 62 (22) (2014) 5881–5891, ISSN 1053-587X, doi:\bibinfo{doi}{10.1109/TSP.2014.2358956}, URL <http://ieeexplore.ieee.org/articleDetails.jsp?arnumber=6914572>.
- [98] S. Lavoie-Courchesne, P. Rioux, F. Chouinard-Decorte, T. Sherif, M. E. Rousseau, S. Das, R. Adalat, J. Doyon, C. Craddock, D. Margulies, C. Chu, O. Lyttelton, A. C. Evans, P. Bellec, Integration of a neuroimaging processing pipeline into a pan-canadian computing grid, *Journal of Physics: Conference Series* 341 (1) (2012) 012032+, URL <http://dx.doi.org/10.1088/1742-6596/341/1/012032>.
- [99] Z. Chen, C. Leng, Dynamic Covariance Models, *Journal of the American Statistical Association* (2015) 1–55ISSN 0162-1459, doi:\bibinfo{doi}{10.1080/01621459.2015.1077712}, URL <http://www.tandfonline.com/doi/abs/10.1080/01621459.2015.1077712><http://www.tandfonline.com/doi/full/10.1080/01621459.2015.1077712>.
- [100] M. Nuñez-García, S. Simpraga, M. A. Jurado, M. Garolera, R. Pueyo, L. Igual, FADR: Functional-Anatomical Discriminative Regions for Rest fMRI Characterization, in: L. Zhou, L. Wang, Q. Wang, Y. Shi (Eds.), *Machine Learning in Medical Imaging*, Springer International Publishing, 61–68, doi:\bibinfo{doi}{10.1007/978-3-319-24888-2{\\_}8}, URL [http://link.springer.com/10.1007/978-3-319-24888-2{\\\_}8](http://link.springer.com/10.1007/978-3-319-24888-2{\_}8), 2015.
- [101] B. Solmaz, S. Dey, A. R. Rao, M. Shah, ADHD classification using bag of words approach on network features, in: D. R. Haynor, S. Ourselin (Eds.), *Medical Imaging 2012: Image Processing*. Edited by Haynor, vol. 8314, 83144T, URL <http://adsabs.harvard.edu/abs/2012SPIE.8314E.164S>, 2012.
- [102] A. Anderson, P. K. Douglas, W. T. Kerr, V. S. Haynes, A. L. Yuille, J. Xie, Y. N. Wu, J. a. Brown, M. S. Cohen, Non-negative matrix factorization of multimodal MRI, fMRI and phenotypic data reveals differential changes in default mode subnetworks in ADHD, *NeuroImage* ISSN 10538119, doi:\bibinfo{doi}{10.1016/j.neuroimage.2013.12.015}, URL <http://dx.doi.org/10.1016/j.neuroimage.2013.12.015>.
- [103] S. K. Bakhtiari, G.-A. Hossein-Zadeh, Subspace-based Identification Algorithm for characterizing causal networks in resting brain., *NeuroImage* 60 (2) (2012) 1236–49, ISSN 1095-9572, URL <http://www.sciencedirect.com/science/article/pii/S105381191200016X>.
- [104] J. R. Sato, D. Y. Takahashi, M. Q. Hoexter, K. B. Massirer, A. Fujita, Measuring network’s entropy in ADHD: a new approach to investigate neuropsychiatric disorders., *NeuroImage* 77 (2013) 44–51, ISSN 1095-9572, URL <http://www.ncbi.nlm.nih.gov/pubmed/23571416>.
- [105] S. Kyeong, S. Park, K.-A. Cheon, J.-J. Kim, D.-H. Song, E. Kim, A New Approach to Investigate the Association between Brain Functional Connectivity and Disease Characteristics of Attention-Deficit/Hyperactivity Disorder: Topological Neuroimaging Data Analysis., *PloS one* 10 (9) (2015) e0137296, ISSN 1932-6203, URL <http://journals.plos.org/plosone/article?id=10.1371/journal.pone.0137296>.
- [106] J. R. Sato, M. Q. Hoexter, X. F. Castellanos, L. A. Rohde, Abnormal brain connectivity patterns in adults with ADHD: a coherence study., *PloS one* 7 (9) (2012) e45671, ISSN 1932-6203, doi:



- \bibinfo{doi}{10.1371/journal.pone.0045671}, URL <http://dx.plos.org/10.1371/journal.pone.0045671>.
- [107] D. Y. Takahashi, J. R. Sato, C. E. Ferreira, A. Fujita, Discriminating different classes of biological networks by analyzing the graphs spectra distribution., PloS one 7 (12) (2012) e49949, ISSN 1932-6203, URL <http://www.pubmedcentral.nih.gov/articlerender.fcgi?artid=3526608&tool=pmcentrez&rendertype=abstract>.
- [108] L. He, X. Kong, P. S. Yu, A. B. Ragin, Z. Hao, X. Yang, DuSK: A Dual Structure-preserving Kernel for Supervised Tensor Learning with Applications to Neuroimages, in: Proc of the Thirteenth SIAM International Conference on Data Mining (SDM 2013), Philadelphia, PA, 127–135, doi:\bibinfo{doi}{<http://epubs.siam.org/doi/abs/10.1137/1.9781611973440.15>}, URL <http://epubs.siam.org/doi/abs/10.1137/1.9781611973440.15>, 2013.
- [109] X. Kong, P. S. Yu, X. Wang, A. B. Ragin, Discriminative Feature Selection for Uncertain Graph Classification, in: Proc of the Thirteenth SIAM International Conference on Data Mining (SDM 2013), Philadelphia, PA, URL <http://arxiv.org/abs/1301.6626>, 2013.
- [110] Y. Yao, W. L. Lu, B. Xu, C. B. Li, C. P. Lin, D. Waxman, J. F. Feng, The increase of the functional entropy of the human brain with age., Scientific reports 3 (2013) 2853, ISSN 2045-2322, URL <http://www.nature.com/srep/2013/131009/srep02853/full/srep02853.html>.
- [111] S. Yang, Z. Lu, X. Shen, P. Wonka, J. Ye, Fused Multiple Graphical Lasso, SIAM Journal on Optimization 25 (2) (2015) 916–943, ISSN 1052-6234, doi:\bibinfo{doi}{10.1137/130936397}, URL <http://epubs.siam.org/doi/abs/10.1137/130936397>.
- [112] M. Ahn, H. Shen, W. Lin, H. Zhu, A Sparse Reduced Rank Framework for Group Analysis of Functional Neuroimaging Data, Statistica Sinica (JANUARY), ISSN 10170405, doi:\bibinfo{doi}{10.5705/ss.2013.232w}, URL <http://www3.stat.sinica.edu.tw/statistica/J25N1/J25N117/J25N117.html>.
- [113] A. Fujita, D. Y. Takahashi, A. G. Patriota, J. R. Sato, A non-parametric statistical test to compare clusters with applications in functional magnetic resonance imaging data., Statistics in medicine ISSN 1097-0258, URL <http://www.ncbi.nlm.nih.gov/pubmed/25185759>.
- [114] P. T. Reiss, L. Huo, Y. Zhao, C. Kelly, R. T. Ogden, Wavelet-domain Regression and Predictive Inference in Psychiatric Neuroimaging, The SelectedWorks of Philip T. Reiss URL [http://works.bepress.com/phil/\\_reiss/29](http://works.bepress.com/phil/_reiss/29).
- [115] J. B. Colby, Development of human brain connectivity in health and disease, Phd dissertation, University of California at Los Angeles, URL <http://escholarship.org/uc/item/2p3471tj{#}page-2>, 2012.
- [116] S. Dey, Automatic Detection of Brain Functional Disorder Using Imaging Data, Phd dissertation, University of Central Florida, 2014.
- [117] B. Zhang, Dimension Reduction and Classification for High Dimensional Complex Data, Ph.D. thesis, North Carolina State University, URL <http://www.lib.ncsu.edu/resolver/1840.16/9022>, 2012.
- [118] N. A. van Galen Last, Cortical Parcellation and Classification using PageRank Clustering and the Small-Worldness of ADHD, Master’s thesis, Delft University of Technolgy, URL <http://www.lib.ncsu.edu/resolver/1840.16/9022>, 2011.
- [119] M. C. Vidal, Análise da estrutura de clusterização das redes de conectividade funcional do cérebro para investigar as bases das desordens do espectro autista, Ph.D. thesis, Universidade de São Paulo, São Paulo, 2014.
- [120] P. Wang, Machine Learning Approaches for Disease State Classification from Neuroimaging Data, Masters thesis, Auburn University, URL <http://etd.auburn.edu/etd/handle/10415/3623>, 2013.
- [121] S. Dey, R. Rao, M. Shah, B. Solmaz, Method and system for modeling and processing fmri image data using a bag-of-words approach, URL <http://www.google.com/patents/US20130211229>, 2013.

Table 2: **Structural MRI acquisition parameters by site.** Seq: imaging sequence, FA: flip angle, TE: echo time, TR: repetition time, TI: inversion recovery delay, PA: parallel acquisition, Res: voxel resolution, BHBU: Bradley Hospital/ Brown University, KKI: Kennedy Krieger Institute, NI: NeuroIMAGE sample, NYU: New York University Child Study Center, OHSU: Oregon Health Sciences University, PKU: Peking University, Pitt: University of Pittsburgh, WUSTL: Washington University at Saint Louis, Trio: Siemens TIM Trio 3T, Allegra: Siemens Allegra, Avanto: Siemens Avanto, MPRAGE: magnetization prepared rapid gradient echo, S: sensitivity encoding (SENSE), G: generalized auto-calibrating partially parallel acquisition (GRAPPA)

| Site      | Scanner     | Seq       | FA  | TE      | TR      | TI      | PA           | Res.                                        |
|-----------|-------------|-----------|-----|---------|---------|---------|--------------|---------------------------------------------|
| BHBU      | Trio 3T     | 3D MPRAGE | 9°  | 2.98 ms | 2250 ms | 900 ms  | None         | $1.00 \times 1.00 \times 1.00 \text{ mm}^3$ |
| KKI       | Phillips 3T | 3D MPRAGE | 8°  | 3.7 ms  | 3500 ms | 1000 ms | S $\times 2$ | $1.00 \times 1.00 \times 1.00 \text{ mm}^3$ |
| NI        | Avanto 1.5T | 3D MPRAGE | 7°  | 2.95 ms | 2730 ms | 1000 ms | G $\times 2$ | $1.00 \times 1.00 \times 1.00 \text{ mm}^3$ |
| NYU       | Allegra 3T  | 3D MPRAGE | 7°  | 3.25 ms | 2530 ms | 1100 ms | None         | $1.30 \times 1.00 \times 1.30 \text{ mm}^3$ |
| OHSU      | Trio 3T     | 3D MPRAGE | 10° | 3.58 ms | 2300 ms | 900 ms  | None         | $1.00 \times 1.00 \times 1.10 \text{ mm}^3$ |
| PKU 1     | Trio 3T     | 3D MPRAGE | 7°  | 3.39 ms | 2530 ms | 1100 ms | None         | $1.30 \times 1.00 \times 1.30 \text{ mm}^3$ |
| PKU 2     | Trio 3T     | 3D MPRAGE | 7°  | 3.45 ms | 2530 ms | 1100 ms | None         | $1.00 \times 1.00 \times 1.00 \text{ mm}^3$ |
| PKU 3 (1) | Trio 3T     | 3D MPRAGE | 12° | 3.67 ms | 2000 ms | 1100 ms | None         | $0.94 \times 0.94 \times 1.00 \text{ mm}^3$ |
| PKU 3 (2) | Trio 3T     | 3D MPRAGE | 10° | 2.60 ms | 1950 ms | 900 ms  | None         | $1.00 \times 1.00 \times 1.30 \text{ mm}^3$ |
| PKU 3 (3) | Trio 3T     | 3D MPRAGE | 7°  | 3.37 ms | 2530 ms | 1100 ms | None         | $1.00 \times 1.00 \times 1.33 \text{ mm}^3$ |
| PKU 3 (4) | Trio 3T     | 3D MPRAGE | 12° | 3.92 ms | 1770 ms | 1100 ms | None         | $0.50 \times 0.50 \times 1.00 \text{ mm}^3$ |
| PKU 3 (5) | Trio 3T     | 3D MPRAGE | 8°  | 2.89 ms | 845 ms  | 600 ms  | None         | $1.02 \times 1.02 \times 1.30 \text{ mm}^3$ |
| Pitt      | Trio 3T     | 3D MPRAGE | 8°  | 3.43 ms | 2100 ms | 1050 ms | None         | $1.00 \times 1.00 \times 1.00 \text{ mm}^3$ |
| WUSTL     | Trio 3T     | 3D MPRAGE | 8°  | 3.08 ms | 2400 ms | 1000 ms | G $\times 2$ | $1.00 \times 1.00 \times 1.00 \text{ mm}^3$ |

Table 3: **Resting state fMRI acquisition parameters by site.** Seq: imaging sequence, FA: flip angle, TE: echo time, TR: repetition time, PA: parallel acquisition,  $N_{slc}$ : number of slices, Th.: slice thickness, Slc. Acq.: slice acquisition order,  $N_{TR}$ : number of measurements (TRs), BHBU: Bradley Hospital/ Brown University, KKI: Kennedy Krieger Institute, NI: NeuroIMAGE sample, NYU: New York University Child Study Center, OHSU: Oregon Health Sciences University, PKU: Peking University, Pitt: University of Pittsburgh, Pitt 2: U. Pitt. parameters used for acquiring the testing data, WUSTL: Washington University at Saint Louis, EPI: echo planar imaging, PACE: Prospective Acquisition CorrEction (EPI with prospective motion correction), S: sensitivity encoding (SENSE), G: generalized autocalibrating partially parallel acquisition (GRAPPA), int+: slices were acquired interleaved ascending, seq+: slices were acquired sequentially ascending, var.: the number of measurements varies across datasets, fixate: participants were asked to keep their eyes open and fixate on an image, closed: participants were asked to keep their eyes closed, open: participants were asked to keep their eyes open.

| Site   | Seq  | FA  | TE    | TR      | PA           | $N_{slc}$ | Th.    | Slc. Acq. | Resolution                      | $N_{TR}$ | Instructions     |
|--------|------|-----|-------|---------|--------------|-----------|--------|-----------|---------------------------------|----------|------------------|
| BHBU   | PACE | 90° | 25 ms | 2000 ms | None         | 35        | 3 mm   | int+      | $3.0 \times 3.0 \text{ mm}^2$   | 256      | fixate           |
| KKI    | EPI  | 75° | 30 ms | 2500 ms | $S \times 3$ | 47        | 3 mm   | seq+      | $3.0 \times 3.0 \text{ mm}^2$   | 128      | fixate           |
| NI     | EPI  | 80° | 40 ms | 1960 ms | $G \times 2$ | 37        | 3 mm   | int+      | $3.5 \times 3.5 \text{ mm}^2$   | 266      | eyes closed      |
| NYU    | EPI  | 90° | 15 ms | 2000 ms | None         | 33        | 4 mm   | int+      | $3.0 \times 3.0 \text{ mm}^2$   | 180      | eyes closed      |
| OHSU   | EPI  | 90° | 30 ms | 2500 ms | None         | 36        | 3.8 mm | int+      | $3.8 \times 3.8 \text{ mm}^2$   | 82       | fixate           |
| PKU 1  | EPI  | 90° | 30 ms | 2000 ms | None         | 33        | 4.2 mm | int+      | $3.1 \times 3.1 \text{ mm}^2$   | 240      | closed or fixate |
| PKU 2  | EPI  | 90° | 30 ms | 2000 ms | None         | 33        | 3.6 mm | int+      | $3.1 \times 3.1 \text{ mm}^2$   | 240      | closed or fixate |
| PKU 3  | EPI  | 90° | 30 ms | 2000 ms | None         | 30        | 4.5 mm | int+      | $3.44 \times 3.44 \text{ mm}^2$ | 240      | closed or fixate |
| Pitt   | EPI  | 70° | 29 ms | 1500 ms | $G \times 2$ | 29        | 4.0 mm | int+      | $3.1 \times 3.1 \text{ mm}^2$   | 200      | open or closed   |
| Pitt 2 | EPI  | 90° | 30 ms | 3000 ms | None         | 46        | 3.5 mm | int+      | $3.8 \times 3.8 \text{ mm}^2$   | 128      | open or closed   |
| WUSTL  | EPI  | 90° | 27 ms | 2500 ms | None         | 32        | 4.0 mm | int+      | $4.0 \times 4.0 \text{ mm}^2$   | var.     | fixate           |

Table 4: **Summary of the characteristics of all brain parcellations used in the ADHD-200 Preprocessed release.** Sizes for the parcels are reported in mm<sup>3</sup>.

| Name    | Type       | # parcels | mean size | std size | min size | max size |
|---------|------------|-----------|-----------|----------|----------|----------|
| AAL     | structural | 116       | 16726     | 11896    | 768      | 55552    |
| EZ      | structural | 116       | 15880     | 11059    | 1344     | 52608    |
| HO      | structural | 111       | 14540     | 15342    | 64       | 99200    |
| TT      | structural | 97        | 17106     | 16164    | 64       | 70400    |
| CC200   | functional | 190       | 11351     | 2001     | 2880     | 17856    |
| CC400   | functional | 351       | 6144      | 1207     | 64       | 10048    |
| ROI1000 | functional | 954       | 1404      | 366      | 27       | 2781     |
| ROI3000 | functional | 2843      | 471       | 109      | 27       | 1026     |
